# Supplementary material
Source: ML conference proceedings conference paper supplement (https://www.ecva.net/papers/eccv_2022/papers_ECCV/html/136630531_ECCV_2022_paper.php)
Supplement: Supplementary file 2 [file 136630531-supp.zip]

Archive with 2 entries (2 files):
- 7028-supp.pdf
- Supplementary_interpolation.mp4
